# Supplementary material for: Facile synthesis of gold–platinum dendritic nanostructures with enhanced electrocatalytic performance for the methanol oxidation reaction
Source: Royal Society of Chemistry journal article supplement (doi:10.1039/c6ra06370e), 2016-01-01
Supplement: c6ra06370e1.pdf [file c6ra06370e1.pdf]

## **Electronic Supporting Information**

### **Facile synthesis of gold–platinum dendritic nanostructure with enhanced electrocatalytic performance for methanol oxidation reaction**

Yehui Zhang, Chenchen Lu, Guili Zhao, Zhenghua Wang\*

*Key Laboratory of Functional Molecular Solids, Ministry of Education, College of  
Chemistry and Materials Science, Anhui Normal University, Wuhu 241000, P. R.  
China*

\*Corresponding author. Tel.: +86-553-3869303; Fax: +86-553-3869302; E-mail:  
zhwang@mail.ahnu.edu.cn.

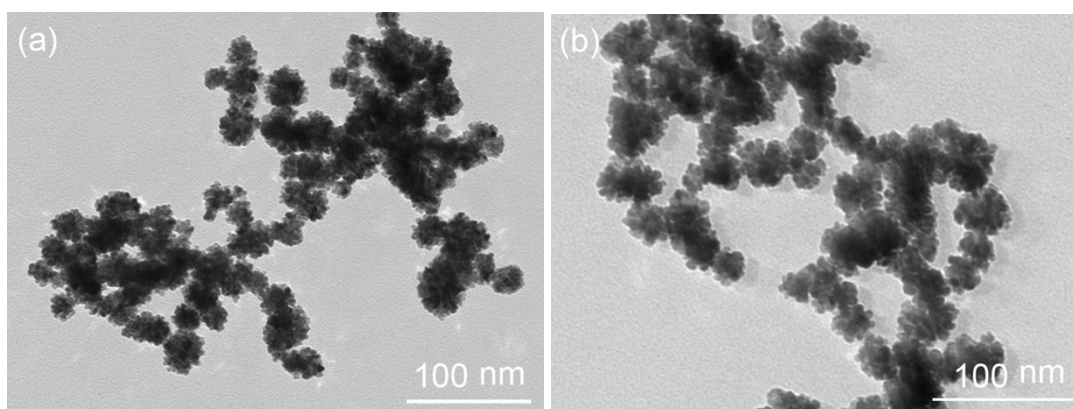

**Fig. S1** TEM images of (a) AuPt-1 and (b) AuPt-3 samples.

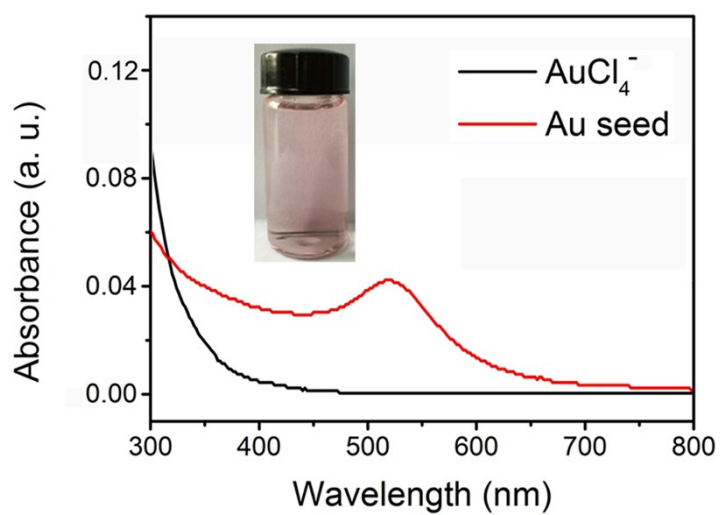

**Fig. S2** UV-visible absorption spectra of  $\text{HAuCl}_4$  solution and the Au seed contained light pink solution obtained by adding sodium citrate into  $\text{HAuCl}_4$  solution. Inset shows a photograph of the light pink solution.

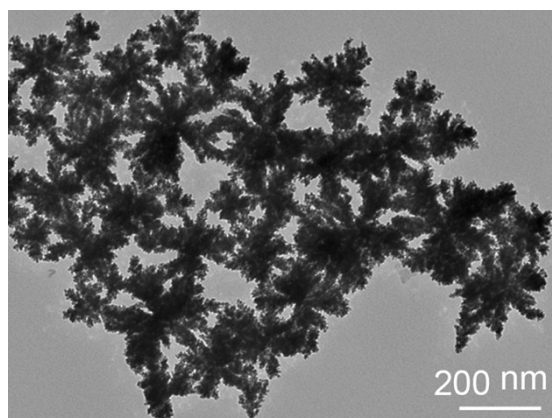

**Fig. S3** TEM image of the Au-Pt sample obtained without sodium citrate.

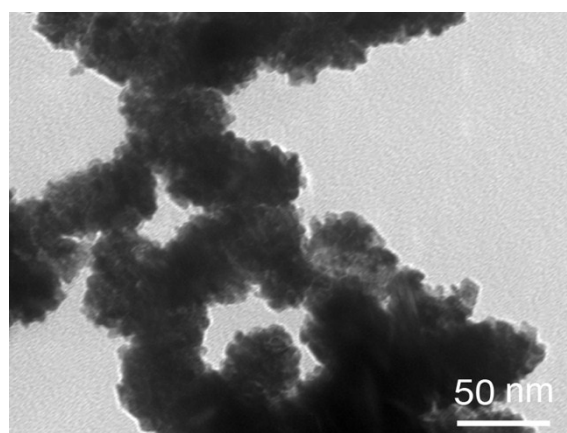

**Fig. S4** TEM image of pure Pt nanoparticles.
